# Supplementary material for: The first-principles study of interfacial bonding strength and segregation behavior of alloyed elements at the η(MgZn2)/Al interface
Source: Royal Society of Chemistry journal article supplement (doi:10.1039/d4cp01180e), 2024-01-01
Supplement: d4cp01180e1.pdf [file d4cp01180e1.pdf]

## Supplementary Materials for

### The First-Principles Study of Interfacial Bonding Strength and Segregation

#### Behavior of Alloyed Elements At $\eta$ (MgZn<sub>2</sub>)/Al Interface

Qing Gao<sup>a</sup>, Guoyu Qiao<sup>b</sup>, Weibing Wang<sup>a</sup>, Yuxiang Ge<sup>a</sup>, Junqiang Ren<sup>a</sup>, Wei Li<sup>a</sup>,

Ping Yang<sup>a</sup>, Xuefeng Lu<sup>a,\*</sup>, Jisen Qiao<sup>a,\*</sup>

*a State Key Laboratory of Advanced Processing and Recycling of Non-ferrous Metal,  
Department of Materials Science and Engineering, Lanzhou University of Technology,*

*Lanzhou 730050 PR China*

*b Southwest Jiaotong University, College of Leeds, Major of Computer and Science,*

*Pidu District, 611700, Chengdu, Sichuan, China, 2073895868@qq.com*

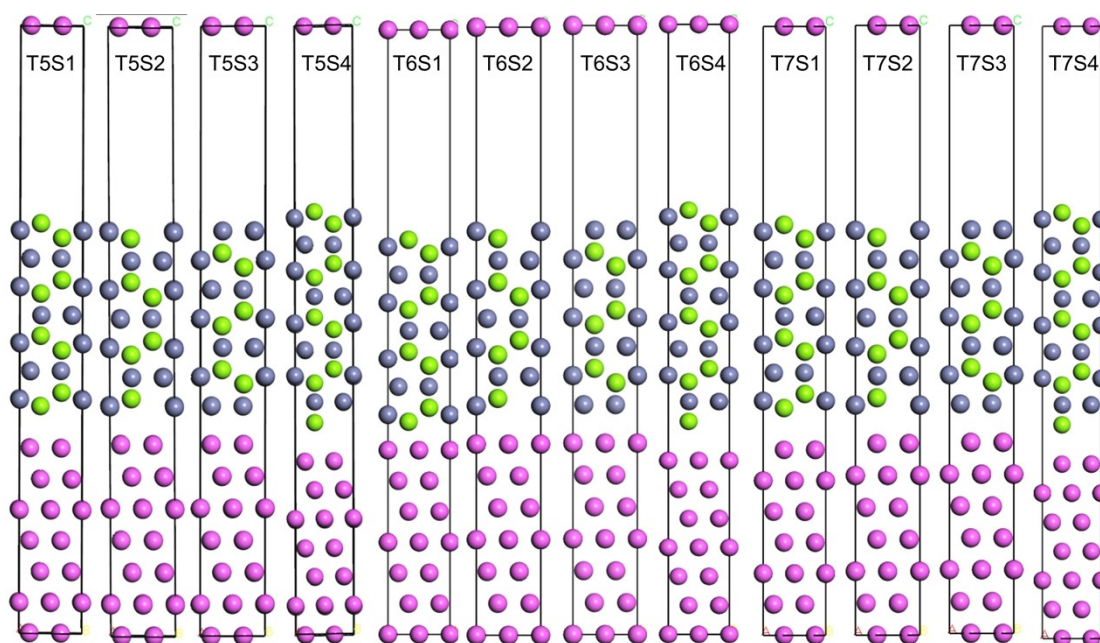

Fig.S1. Interface models of 12 different terminals projected along axis [010]

Table.S1. The charge distribution of interface atoms

| Interface atoms | T5(Charge/e) |       |       |       | Interface atoms | T6(Charge/e) |       |       |       | Interface atoms | T7(Charge/e) |       |       |       |
|-----------------|--------------|-------|-------|-------|-----------------|--------------|-------|-------|-------|-----------------|--------------|-------|-------|-------|
|                 | S1           | S2    | S3    | S4    |                 | S1           | S2    | S3    | S4    |                 | S1           | S2    | S3    | S4    |
| Al(5)           | -0.19        | -0.19 | -0.12 | -0.12 | Al(3)           | -0.06        | -0.21 | -0.09 | -0.01 | Al(7)           | -0.1         | -0.07 | -0.04 | -0.11 |
| Al(12)          | -0.19        | -0.19 | -0.13 | -0.12 | Al(10)          | -0.21        | -0.13 | -0.06 | -0.21 | Al(14)          | -0.36        | -0.37 | -0.04 | -0.34 |
| Al(19)          | -0.13        | -0.01 | 0.03  | -0.09 | Al(17)          | -0.21        | -0.13 | -0.06 | -0.21 | Al(21)          | -0.1         | -0.07 | -0.04 | -0.11 |
| Al(26)          | -0.19        | -0.19 | -0.13 | -0.12 | Al(24)          | -0.21        | -0.13 | -0.06 | -0.21 | Al(28)          | -0.1         | -0.07 | -0.04 | -0.11 |
| Mg(1)           | 0.83         |       |       |       | Mg(1)           | 0.75         |       |       |       | Mg(1)           | 0.78         |       |       |       |
| Mg(2)           |              | 0.68  |       |       | Mg(2)           |              | 0.54  |       |       | Mg(2)           |              | 0.69  |       |       |
| Mg(3)           |              |       |       | 0.6   | Mg(3)           |              |       |       | 0.51  | Mg(3)           |              |       |       | 0.44  |
| Mg(5)           | 0.65         |       |       |       | Mg(5)           | 0.58         |       |       |       | Mg(5)           | 0.83         |       |       |       |
| Zn(1)           |              |       |       | -0.22 | Zn(1)           |              |       |       | -0.28 | Zn(1)           |              |       |       | -0.31 |
| Zn(3)           |              |       |       | -0.22 | Zn(3)           |              |       |       | -0.28 | Zn(3)           |              |       |       | -0.31 |
| Zn(5)           |              |       |       | -0.22 | Zn(5)           |              |       |       | -0.28 | Zn(5)           |              |       |       | -0.31 |
| Zn(7)           |              |       | -0.24 |       | Zn(7)           |              |       | -0.32 |       | Zn(7)           |              |       |       | -0.31 |
| Zn(9)           |              |       | -0.24 |       | Zn(9)           |              |       | -0.32 |       | Zn(9)           |              |       |       | -0.31 |
| Zn(10)          | -0.07        |       |       |       | Zn(10)          | -0.09        |       |       |       | Zn(10)          | -0.15        |       |       |       |
| Zn(11)          |              |       | -0.24 |       | Zn(11)          |              |       | -0.32 |       | Zn(11)          |              |       |       | -0.31 |
| Zn(12)          |              | -0.16 |       |       | Zn(12)          |              | -0.12 |       |       | Zn(12)          |              | -0.34 |       |       |
| Total           | 0.71         | -0.06 | -1.07 | -0.51 | Total           | 0.55         | -0.18 | -1.23 | -0.97 | Total           | 0.8          | -0.23 | -1.09 | -1.16 |

Table.S2. Bond population, bond numbers, and bond length of interface atoms

| Interface types | Population of bonds |       |       | Number of bonds |       |       | Length of bonds(Å) |         |          |
|-----------------|---------------------|-------|-------|-----------------|-------|-------|--------------------|---------|----------|
|                 | Al-Zn               | Al-Mg | Total | Al-Zn           | Al-Mg | Total | Al-Zn              | Al-Mg   | Total    |
| T5S1            | 0.91                | 0     | 0.91  | 3               | 0     | 3     | 2.8743             | 0       | 8.6232   |
| T5S2            | 1.01                | 0     | 1.01  | 4               | 0     | 4     | 2.68105            | 0       | 10.7242  |
| T5S3            | 2.39                | 0     | 2.39  | 3               | 0     | 3     | 2.6448             | 0       | 7.9344   |
| T5S4            | 0                   | 0.82  | 0.82  | 0               | 4     | 4     | 0                  | 2.7314  | 10.9256  |
| T6S1            | 1.09                | 0     | 1.09  | 1               | 0     | 1     | 2.60193            | 0       | 2.60193  |
| T6S2            | 2.28                | 0     | 2.28  | 1               | 0     | 1     | 2.7091             | 0       | 2.7091   |
| T6S3            | 0.73                | 0     | 0.73  | 9               | 0     | 9     | 2.50529            | 0       | 22.54791 |
| T6S4            | 0                   | 0.69  | 0.69  | 0               | 3     | 3     | 0                  | 2.87903 | 8.63709  |
| T7S1            | 0.92                | 0.29  | 1.21  | 3               | 1     | 4     | 2.77752            | 2.8949  | 11.22743 |
| T7S2            | 1.14                | 0.31  | 1.45  | 3               | 1     | 4     | 2.67659            | 2.8418  | 10.87157 |
| T7S3            | 2.28                | 0     | 2.28  | 9               | 0     | 9     | 2.77412            | 0       | 24.6708  |
| T7S4            | 0                   | 0.44  | 0.440 | 0               | 1     | 1     | 0                  | 2.9995  | 2.9995   |
